# Supplementary material for: Regulatory Patterns of Crp on Monensin Biosynthesis in Streptomyces cinnamonensis
Source: PubMed Central journal article supplement (PMC7074812; doi:10.3390/microorganisms8020271), 2020-02-17
Supplement: microorganisms-08-00271-s001.pdf [file microorganisms-08-00271-s001.pdf]

## Supplementary Material

### Regulatory patterns of Crp on monensin biosynthesis in *Streptomyces cinnamomensis*

Chun-Yan Lin <sup>a,1</sup>, Yue Zhang <sup>a,c,1</sup>, Ji-Hua Wu <sup>a</sup>, Rong-Hui Xie <sup>a</sup>, Jianjun Qiao <sup>a,b</sup> and Guang-Rong Zhao <sup>a,b,\*</sup>

<sup>a</sup> Frontier Science Center for Synthetic Biology and Key Laboratory of Systems Bioengineering (Ministry of Education), School of Chemical Engineering and Technology, Tianjin University, Yaguan Road 135, Jinnan District, Tianjin 300350, China; lcy87828@126.com (C-Y.L.); zhangy@tib.cas.cn (Y.Z.); 18846321904@163.com (J-H.W); 1835327730@qq.com (R-H.X); jianjunq@tju.edu.cn (J.Q)

<sup>b</sup> SynBio Research Platform, Collaborative, Innovation Center of Chemical Science and Engineering (Tianjin), Tianjin 300072, China

<sup>c</sup> Present address: Tianjin Institute of Industrial Biotechnology, Chinese Academy of Sciences, Tianjin 300308, China

<sup>1</sup> C-Y.L. and Y.Z. contributed equally to this work.

\* Correspondence: grzhao@tju.edu.cn (G-R. Z.); Tel.: +86-22-85356580; Fax: +86-22-27403389

**Table S1** Primers used in this study

| Primer name                                                                     | DNA sequences (5'-3')                                      |
|---------------------------------------------------------------------------------|------------------------------------------------------------|
| <b>For construction of <i>crp</i> overexpression and antisense RNA plasmids</b> |                                                            |
| CZ-F                                                                            | GCTCTAGAGTGGACGACGTTCTGCGG                                 |
| CZ-R                                                                            | TTTTCTTTTTCGGCCGCTCAGCGCGACCGCTTGGC                        |
| CS1-F                                                                           | CCCAAGCTTCAGTGGTGGTGGTGGTGGTGCAGATCT<br>CGCGGCCTGCTCGTCATC |
| CS1-R                                                                           | TGCTCTAGACAGTGGTGGTGGTGGTGGTGCATGCAT<br>ACGGACCCCTGATATGCG |
| <b>For semi-quantitative RT-PCR</b>                                             |                                                            |
| 16S-F                                                                           | CTGCCCTTCACTCTGGGACA                                       |
| 16S-R                                                                           | TCCGACTTCATGGGGTCGAG                                       |
| acs-F                                                                           | TCTGGGCCGAGCAGGCCCGC                                       |
| acs-R                                                                           | GCTGACGGCCTCGTCCACGG                                       |
| pckA-F                                                                          | ATGTACGTCGTGCCCTTCTG                                       |
| pckA-R                                                                          | TCTCGACGGTCCAGCCGGAG                                       |
| accB-F                                                                          | ACTCGGGCGGCGCCCGCATC                                       |
| accB-R                                                                          | ACGTGTTTCGATGACGCCGTG                                      |
| ccr-F                                                                           | GTCAACTACAACCTCCGTGTG                                      |
| ccr-R                                                                           | AACTGCGTGGCGTACGACCC                                       |
| mutB-F                                                                          | ACGAGCGCTACAAGATGATC                                       |
| mutB-R                                                                          | CCCGAAGCCGTCCGCGAGGG                                       |
| epi-F                                                                           | ATGCTGACGCGAATCGACCA                                       |
| epi-R                                                                           | TCAGTGCTCCGGTGCCTCGG                                       |
| acdH-F                                                                          | TGCGCACGGAGGTGCTGCCG                                       |
| acdH-R                                                                          | GCAGGGACAGGCCTGTGGTG                                       |
| atoB-F                                                                          | TGCCAGTGCGGCTCCTCGCA                                       |
| atoB-R                                                                          | ATGAGGGCGGCCGCGCCGTC                                       |

---

|        |                         |
|--------|-------------------------|
| TU1-F  | GACGGCAATCTGCACTACGG    |
| TU1-R  | TGATGTTCGGTCAGTTCGAGGAC |
| TU2-F  | ATGTGGGAGAAGCGGGTGG     |
| TU2-R  | GGTACGGATGGACTGGTTGACG  |
| TU3-F  | GCTCGGGACTGCGGAAGAA     |
| TU3-R  | CGTGCGACGGGAAGCCATT     |
| TU4-F  | TGGAGCGGTGTTTCCCTGTG    |
| TU4-R  | AGCCTCCCGTCGTGCTACCT    |
| TU5-F  | TGGAACGGCGTCTCCCTGTG    |
| TU5-R  | CGTGCGATGTGGCTGTGGTCT   |
| TU6-F  | CCCACGACTACCTGACGCTGAT  |
| TU6-R  | ACGCTGCCCTGTTCCCACTG    |
| TU7-F  | TGACGAGCAGGATGAAGAAGGA  |
| TU7-R  | AACATGGACAACCCGGAACAC   |
| TU8-F  | GGAACTCGCCGACCTCAT      |
| TU8-R  | TGCTGGTTCGTGTTTCAGATAGA |
| monH-F | CCGCTTGGCGTCCTGGAACA    |
| monH-R | TCTGATGGGCGTACTCGGTGAA  |
| crp-F  | GTGGACGACGTTCTGCGG      |
| crp-R  | TCAGCGCGACCGCTTGGC      |

---

**Table S2** Putative gene functions of 57 DEGs

Glycolysis (10):

| Gene     | Function                                            |
|----------|-----------------------------------------------------|
| Scin6520 | Aldose 1-epimerase                                  |
| Scin0389 | Acetyl-CoA synthetase                               |
| Scin4931 | Phosphoenolpyruvate carboxykinase                   |
| Scin0555 | Probable aldehyde dehydrogenase                     |
| Scin1986 | NAD-dependent alcohol dehydrogenase                 |
| Scin3280 | Alcohol dehydrogenase                               |
| Scin4853 | Putative aldehyde dehydrogenase                     |
| Scin0875 | Glucokinase                                         |
| Scin2469 | Glucosyl-3-phosphoglycerate phosphatase             |
| Scin4003 | 3-methyl-2-oxobutanoate dehydrogenase subunit alpha |

Fatty acid degradation (20):

| Gene     | Function                            |
|----------|-------------------------------------|
| Scin2471 | Putative cytochrome P450            |
| Scin3350 | Cytochrome P450                     |
| Scin6039 | 3-ketoacyl-CoA thiolase             |
| Scin2551 | Long-chain-fatty-acid--CoA ligase   |
| Scin1513 | Acyl-CoA dehydrogenase              |
| Scin2065 | Long-chain-fatty-acid--CoA ligase   |
| Scin1599 | Glutaryl-CoA dehydrogenase          |
| Scin0986 | NAD-dependent alcohol dehydrogenase |

|          |                                            |
|----------|--------------------------------------------|
| Scin6804 | Fatty acid oxidation complex subunit alpha |
| Scin2688 | Long-chain-fatty-acid--CoA ligase          |
| Scin2280 | Alcohol dehydrogenase                      |
| Scin0382 | Long-chain specific acyl-CoA dehydrogenase |
| Scin7342 | Acyl-CoA dehydrogenase                     |
| Scin4869 | Acyl-CoA dehydrogenase                     |
| Scin2743 | Long-chain specific acyl-CoA dehydrogenase |
| Scin7189 | Acetyl-CoA acetyltransferase               |
| Scin2312 | C26-monooxygenase                          |
| Scin4504 | Long-chain-fatty-acid--CoA ligase          |
| Scin6924 | Putative cytochrome P450                   |
| Scin7256 | C-12 hydroxylase                           |

Carbon metabolism (27):

| <b>Gene</b> | <b>Function</b>                                           |
|-------------|-----------------------------------------------------------|
| Scin0289    | Long-chain specific acyl-CoA dehydrogenase                |
| Scin5352    | Coenzyme B12-dependent methylmalonyl-CoA mutase B subunit |
| Scin1671    | Phosphoserine phosphatase                                 |
| Scin6706    | Long-chain specific acyl-CoA dehydrogenase                |
| Scin7512    | Glucokinase                                               |
| Scin6534    | Aspartate ammonia-lyase                                   |
| Scin0885    | Alcohol dehydrogenase                                     |
| Scin7131    | Putative protein                                          |
| Scin7361    | Uncharacterized pyridoxal phosphate-dependent protein     |
| Scin1818    | Glucose-6-phosphate 1-dehydrogenase                       |
| Scin6197    | Methylmalonyl-CoA epimerase                               |
| Scin2763    | Long-chain specific acyl-CoA dehydrogenase                |
| Scin4012    | Acyl-CoA carboxylase complex B subunit                    |
| Scin5365    | Phosphate acetyltransferase                               |
| Scin5364    | Acetate kinase                                            |
| Scin1004    | Pyruvate phosphate dikinase                               |
| Scin6441    | Crotonyl-CoA reductase                                    |
| Scin1526    | Glucosyl-3-phosphoglycerate phosphatase                   |
| Scin7132    | Succinate dehydrogenase flavoprotein subunit              |
| Scin7133    | Succinate dehydrogenase iron-sulfur subunit               |
| Scin2281    | Fumarate reductase (CoM/CoB) subunit A                    |
| Scin0394    | NAD-dependent malic enzyme                                |
| Scin2459    | Acetate kinase                                            |
| Scin2569    | Acyl-CoA dehydrogenase                                    |
| Scin5218    | Putative siderophore biosynthesis protein                 |
| Scin5020    | Fatty acid oxidation complex subunit alpha                |
| Scin5021    | Acyl-CoA dehydrogenase                                    |
